# Supplementary material
Source: ML conference proceedings conference paper supplement (https://proceedings.neurips.cc/paper_files/paper/2010/hash/0f2c9a93eea6f38fabb3acb1c31488c6-Abstract.html)
Supplement: Supplementary file 1 [file 0f2c9a93eea6f38fabb3acb1c31488c6-Supplemental.zip]

Archive with 1 entries (1 files):
- extra/NIPS2010_1166_extra.pdf
